# Supplementary material
Source: Springer Nature journal article supplement (https://www.springerprofessional.de/resource/supplementary/13638_2012_553_MOESM3_ESM.pdf/11897984)
Supplement: MOESM3 [file 11897984]

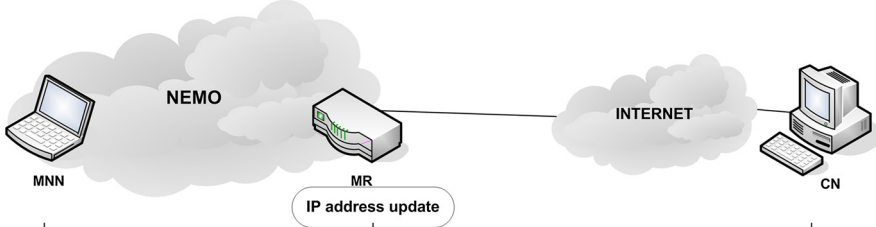

IP address update

NOTIFY\_UPDATE: ESP\_INFO,  
ECHO\_REQUEST\_SIGNED, HMAC, sig

NOTIFY\_UPDATE\_ACK: ACK,  
ECHO\_RESPONSE\_SIGNED, HMAC, sig

UPDATE: ESP\_INFO, HMAC\_ESP\_INFO,  
LOCATOR, SEQ, HMAC.MR, sig

UPDATE: ESP\_INFO, HMAC\_ESP\_INFO, LOCATOR,  
SEQ, ACK, ECHO\_REQUEST, HMAC, sig

UPDATE: ACK, ECHO\_RESPONSE,  
HMAC.MR, sig

IPsec ESP protected data

- Check signature
- Check HMAC
- Store new INDEX
- Generate new keys

- Check signature
- Check HMAC

- Check signature
- Check HMAC
- Store new IP.MR
- Store new INDEX
- Generate new keys
